# Supplementary material
Source: Research Square preprint supplement (doi:10.21203/rs.3.rs-9453943/v1)
Supplement: Supplementary file 1 [file af1ae2bbaf5ef36b47062259.docx]

# **Supplementary information**

## **Experimental design and ratio**

**Supplementary Table 1. Formula of agar-pigface Film**

| Sample | Agar % (w/v) | Pigface % (v/v) | Ratio (A:PF) (w/v) |
| --- | --- | --- | --- |
| P1 | 1.5 | 3.8 | 1:2.5 |
| P2 | 2 | 10 | 1:5 |
| P3 | 1 | 10 | 1:10 |
| P4 | 2.2 | 25 | 1:11 |
| P5 | 1.5 | 25 | 1:16 |
| P6 | 2 | 40 | 1:20 |
| P7 | 1.5 | 46.2 | 1:30 |
| P8 | 0.8 | 25 | 1:31 |
| P9 | 1 | 40 | 1:40 |

**Supplementary Table 2. CHNS elements analysis of tested samples**

| **Sample ID** | **N (%)** | **C (%)** | **H (%)** | **S (%)** |
| --- | --- | --- | --- | --- |
| **Film P5** | 0.64 | 32.17 | 5.71 | 2.22 |
| **PF** | 23.06 | 29.34 | 4.29 | 0.27 |
| **Agar** | 5.66 | 36.75 | 5.52 | 1.49 |

**Supplementary Table 3. Water contact angle of Film P5 & P6 in 30s**

| **Film** | **0s** | **10s** | **20s** | **30s** |
| --- | --- | --- | --- | --- |
| **P5** | 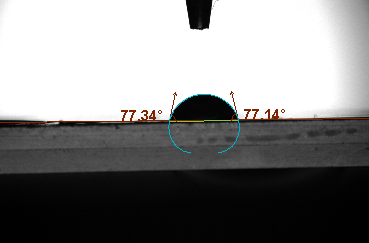 | 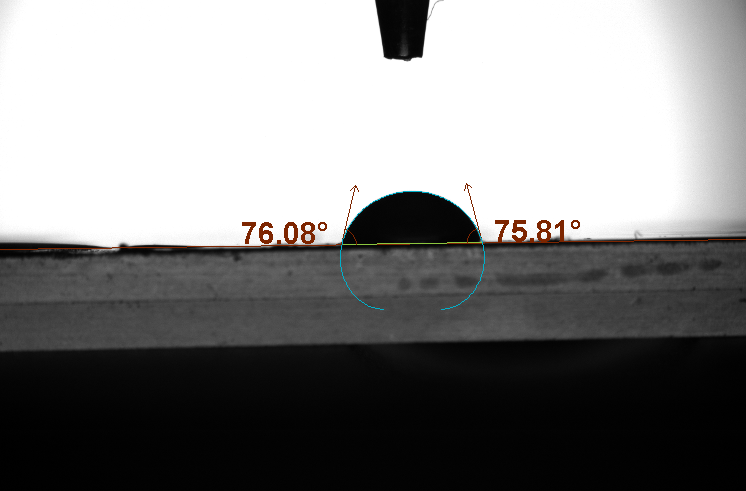 | 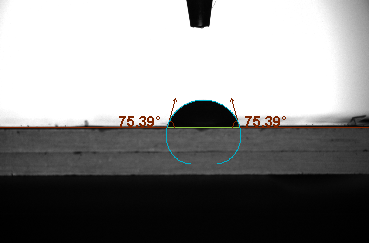 | 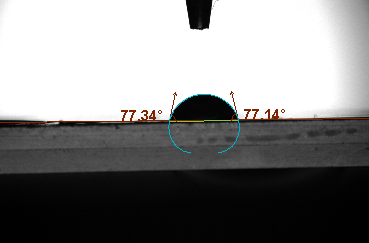 |
| **P6** | 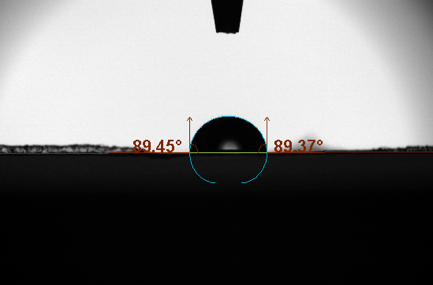 | 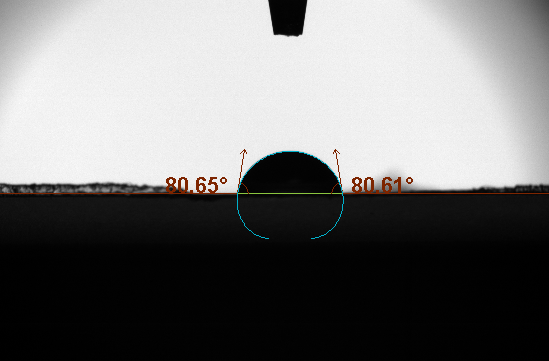 | 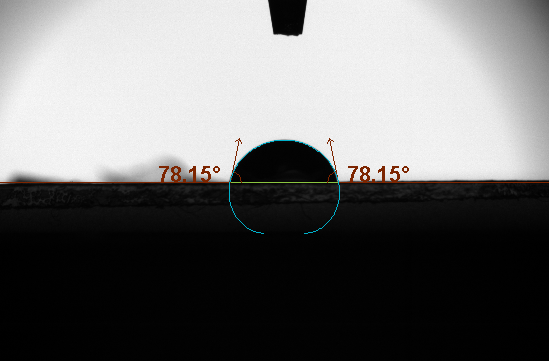 | 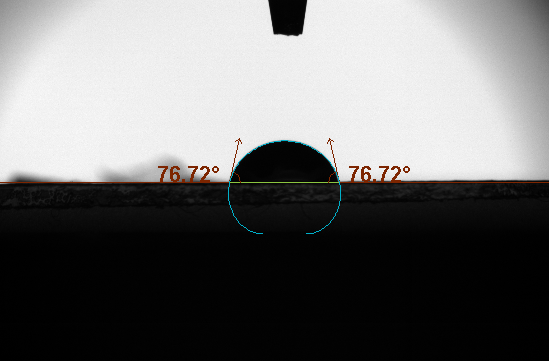 |

**Supplementary Table 4. List of plasticisers and plasticiser-like agents found in pigface using LCMS**

| **Class** | **Compound** |
| --- | --- |
| Sugars | fructose, galactose, sucrose, trehalose |
| Polyols/cyclitols | pinitol, inositol |
| Sugar acids/lactones | δ‑ribono‑1,4‑lactone |
| Small organic acids | lactic acid, malic acid, quinic acid, ascorbic acid |
| Long‑chain diacids | azelaic acid, sebacic acid, octadecenedioic acid |
| Fatty acids | pinolenic acid, octadecatrienoic acid |
| Oxylipins | jasmonic acid, Oxophytodienoic acid, Hydroxy-octadecadienoic acid/ Dihydroxy-octadecenoic acid |
| Monoacylglycerols/phospholipid‑like amphiphiles | glycerol monooleate, glycerophospho‑N‑palmitoyl ethanolamine |
| Fatty acid amides/ethanolamides | oleamide, stearamide, palmitoyl ethanolamide |

**Supplementary Table 5. Characterisation of Control Agar Film**

| **Measurement** | **Value** |
| --- | --- |
| TS (Mpa) | 15.81 |
| EOB (%) | 11.953 |
| WVP (g/m².s.Pa) | 2.91E-11 |
| L* | 92.918 |
| a* | -1.43 |
| b* | 4.288 |
| Opacity (%) | 14.17 |
| Thickness (µm) | 17.2 |
| TPC (mg GAE/g) | 2.47 |
| TEAC (mg/g) | ND |

**Supplementaty Table 6. As, Cd, Cu, Pb and Hg concentrations in pigface samples**

| Samples | As (mg/kg) | Cd (mg/kg) | Cu (mg/kg) | Pb (mg/kg) | Hg (mg/kg) |
| --- | --- | --- | --- | --- | --- |
| SW | 4.66 | 0.13 | 4.54 | 5.74 | 0.002 |
| PF | 14.35 | 0.07 | 2.52 | 0.2 | 0.007 |
| Optimized Film (P5) | 1.93 | 0.04 | 5.18 | 0.43 | 0.025 |


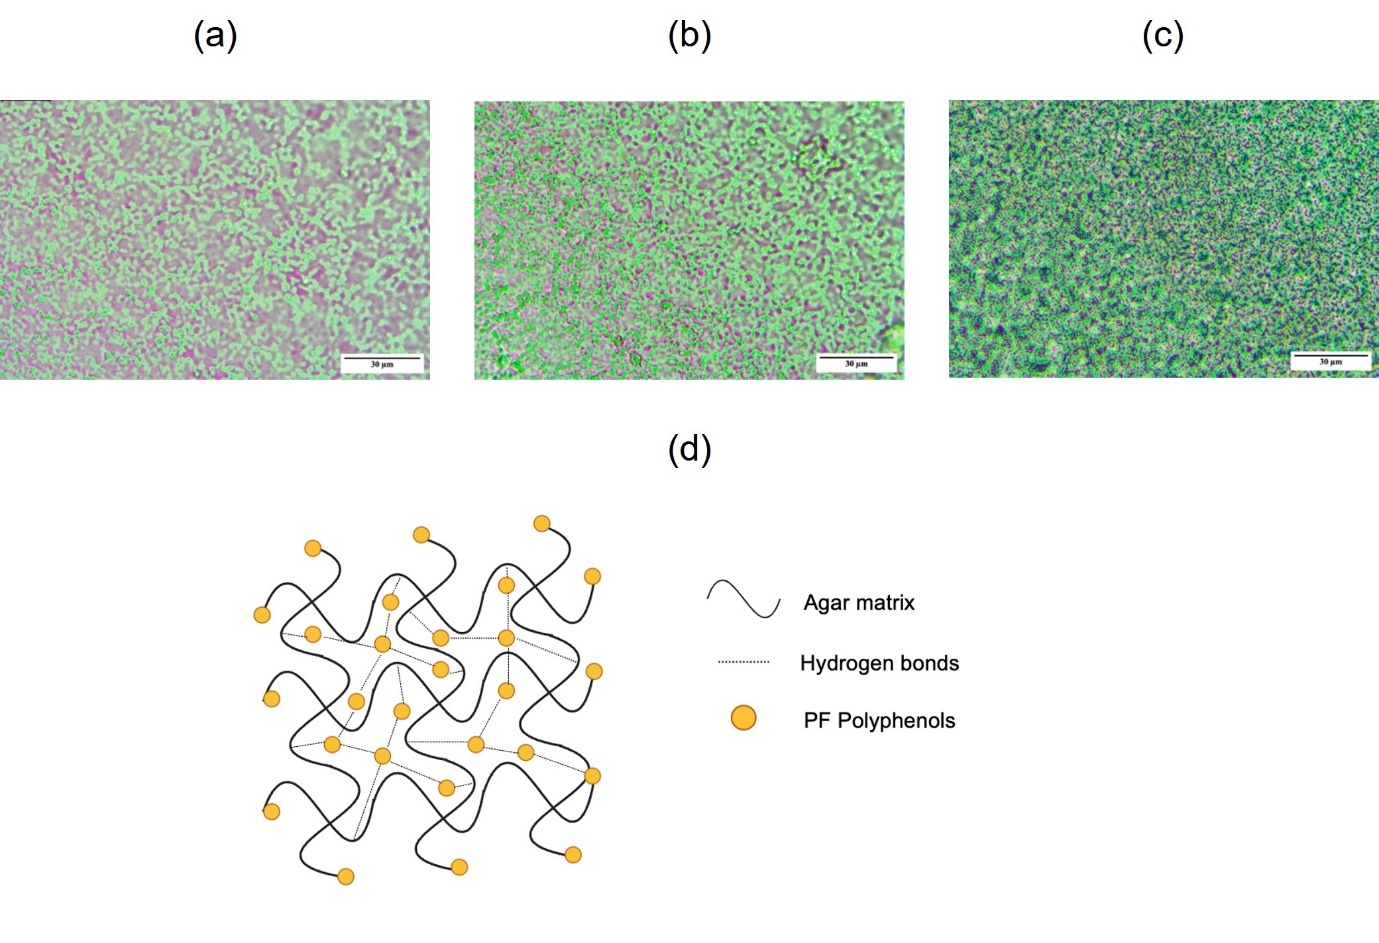


**Supplementary Fig. 1 Microstructure of agar-pigface composite films observed under light microscopy (40×): (a) P1 (A:PF 1:2.5); (b) P6 (A:PF 1:20); (c) P9 (A:PF 1:40); (d) agar-polyphenol matrix**
